# Supplementary material for: Insights in photocatalytic/Fenton-based degradation of microplastics using iron-modified titanium dioxide aerogel powders
Source: Royal Society of Chemistry journal article supplement (doi:10.1039/d4en00818a), 2024-12-18

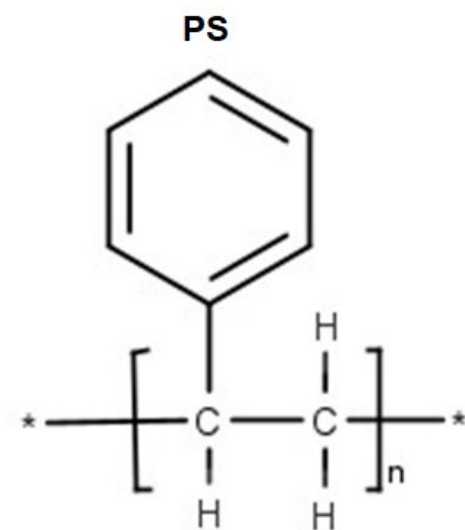

**Fragments detected in pure PS MPs**

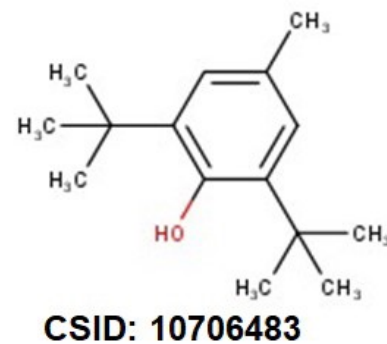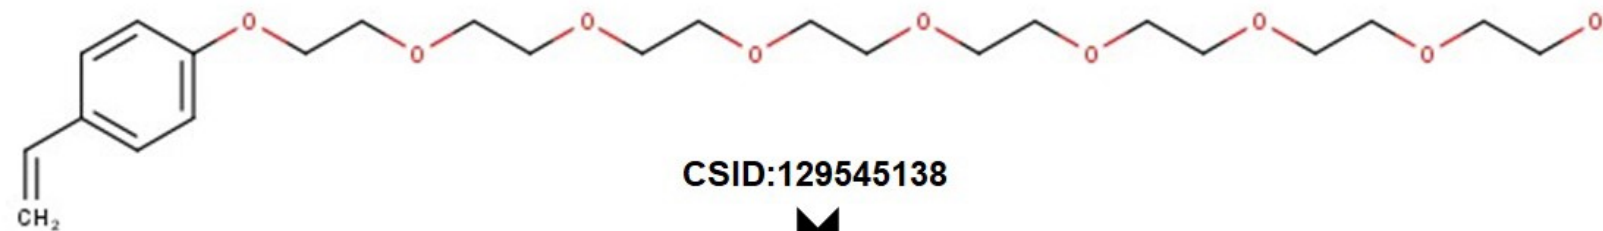

**Fragments detected only after photo-degradation**

**Fragments detected only after photo-degradation**

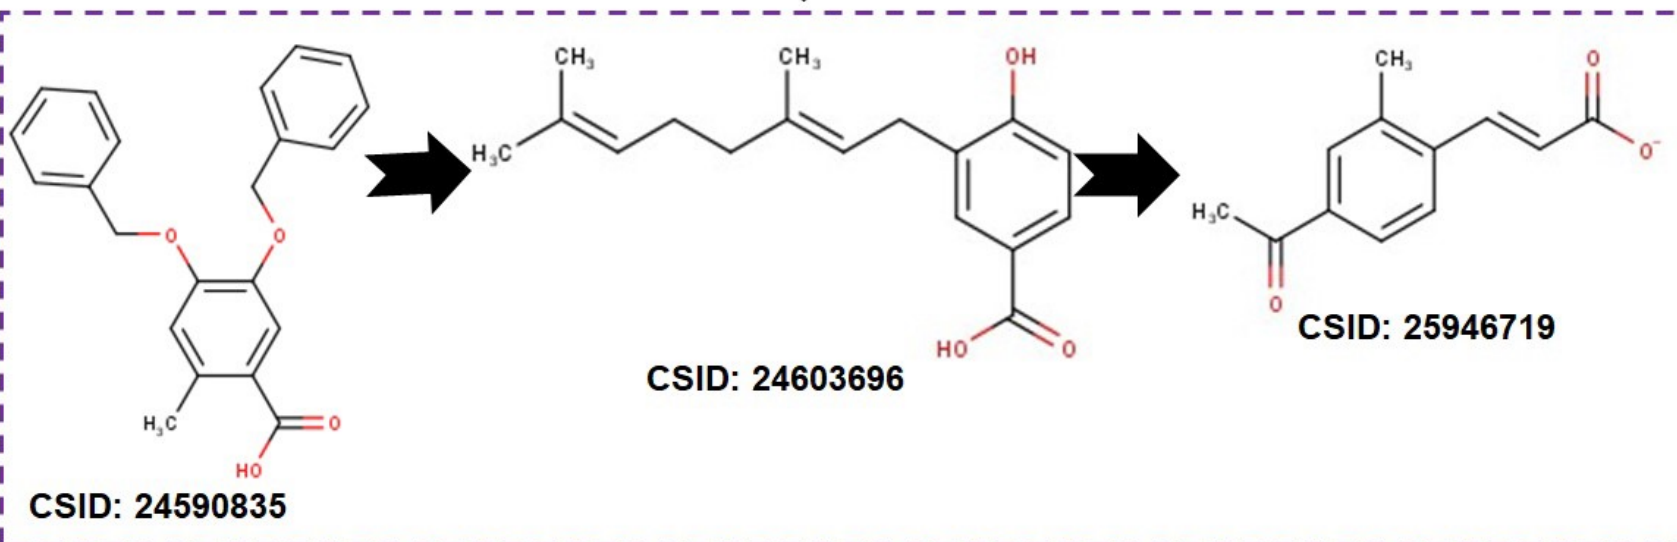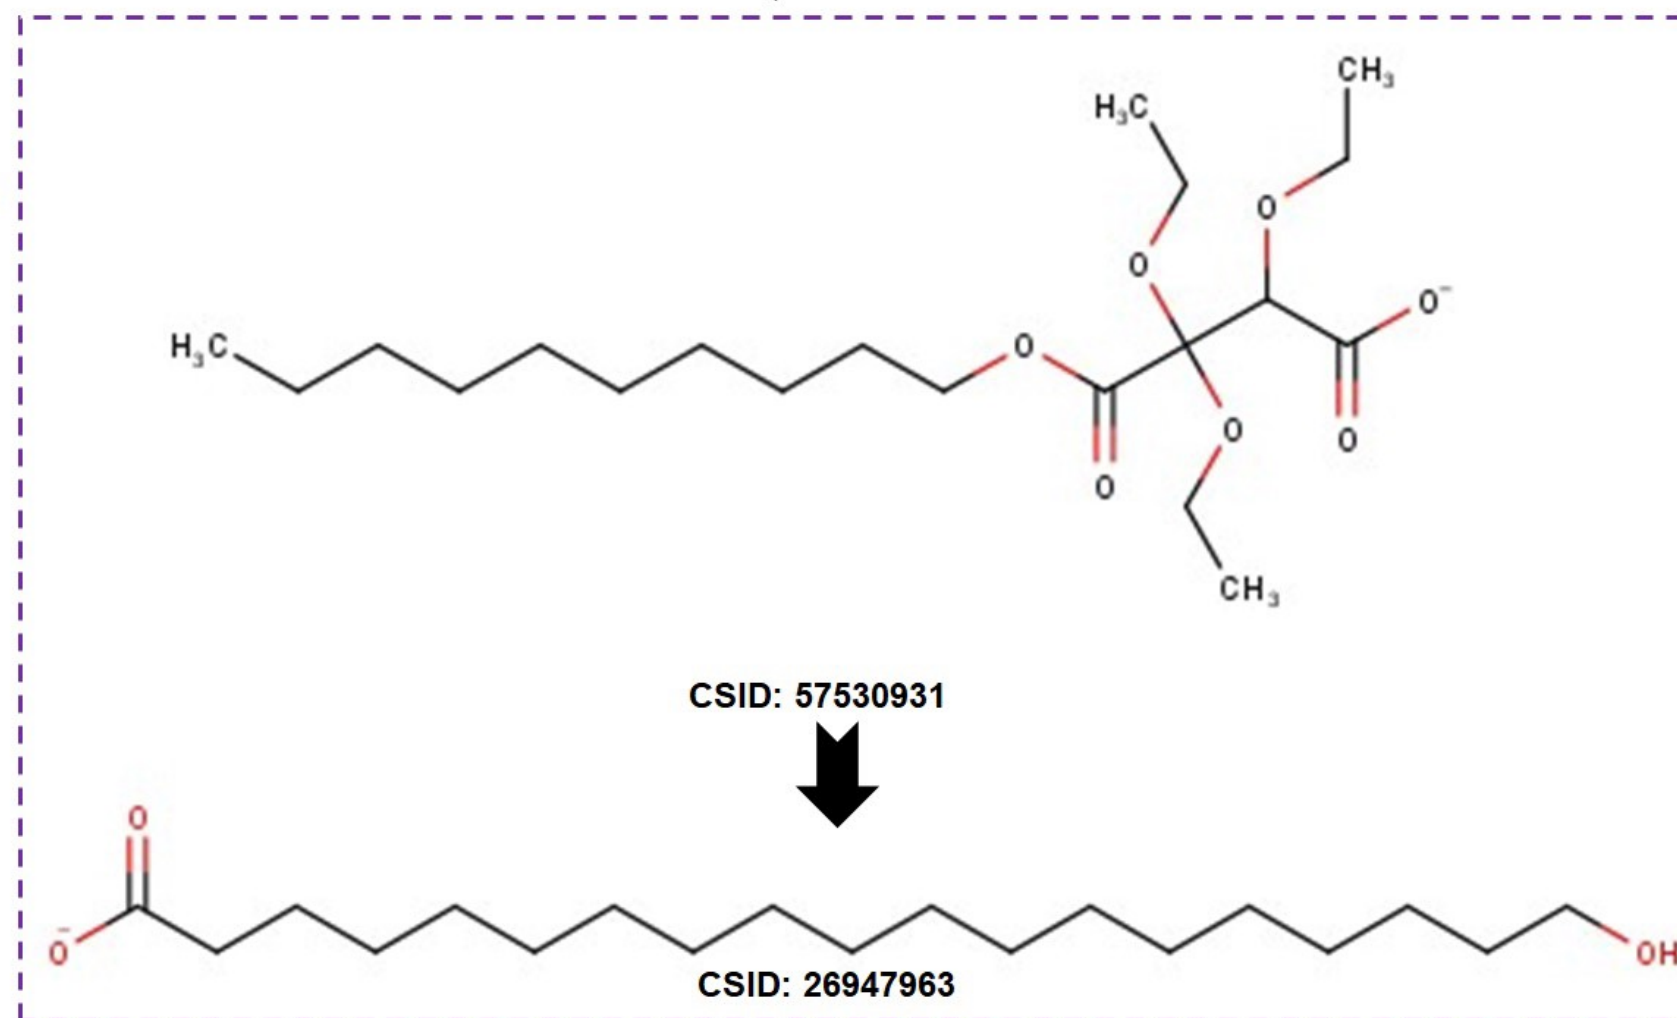

Supplement: d4en00818a10.pdf [file d4en00818a10.pdf]
