# Supplementary figures and images for: Insights in photocatalytic/Fenton-based degradation of microplastics using iron-modified titanium dioxide aerogel powders
Source: Royal Society of Chemistry journal article supplement (doi:10.1039/d4en00818a), 2024-12-18

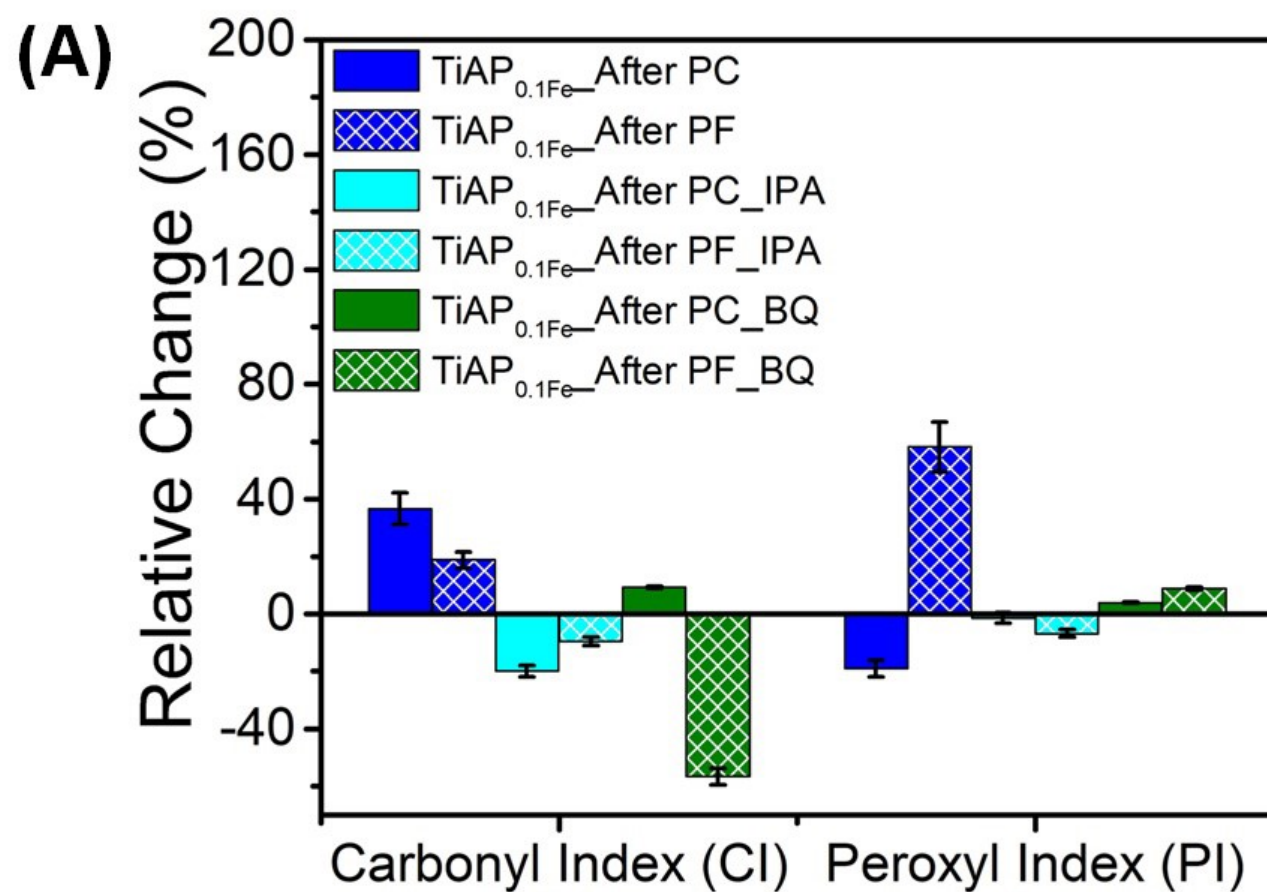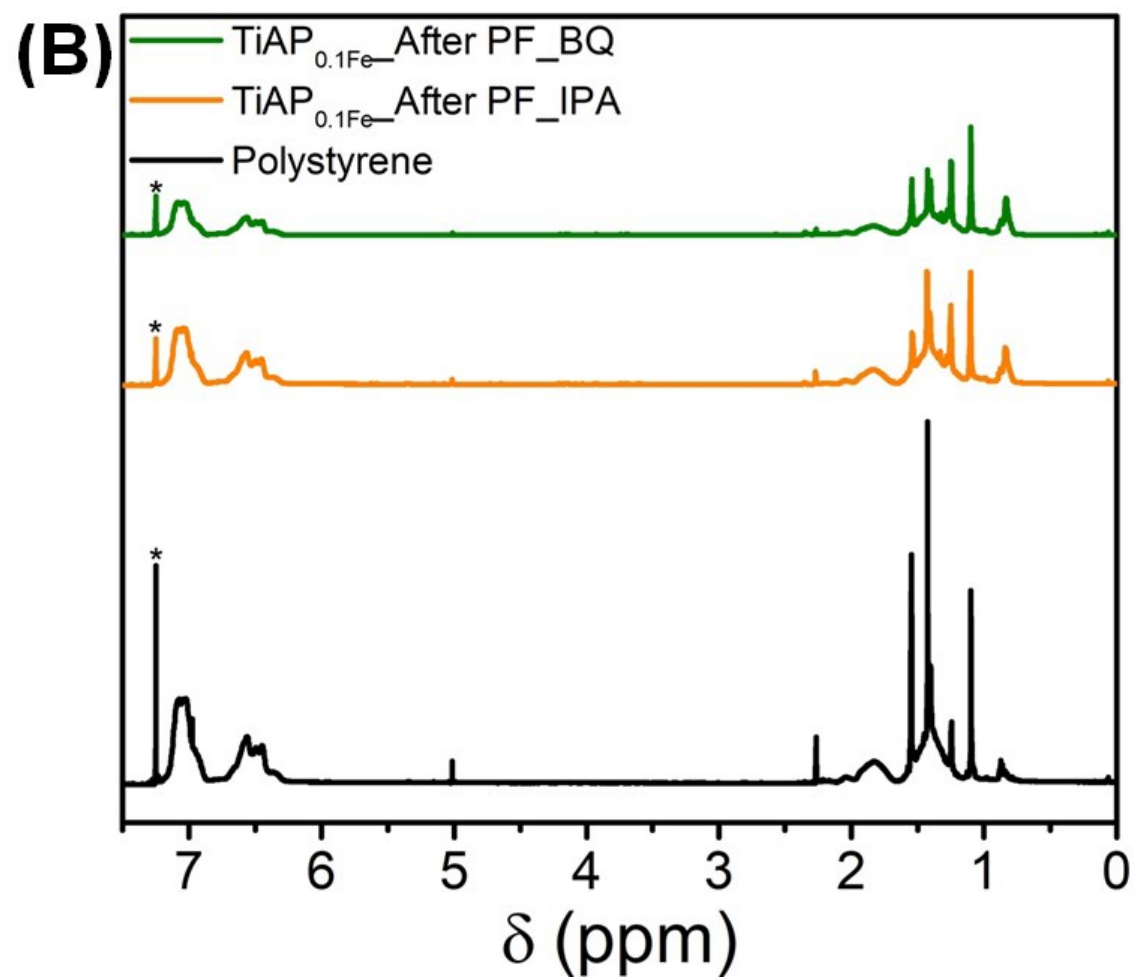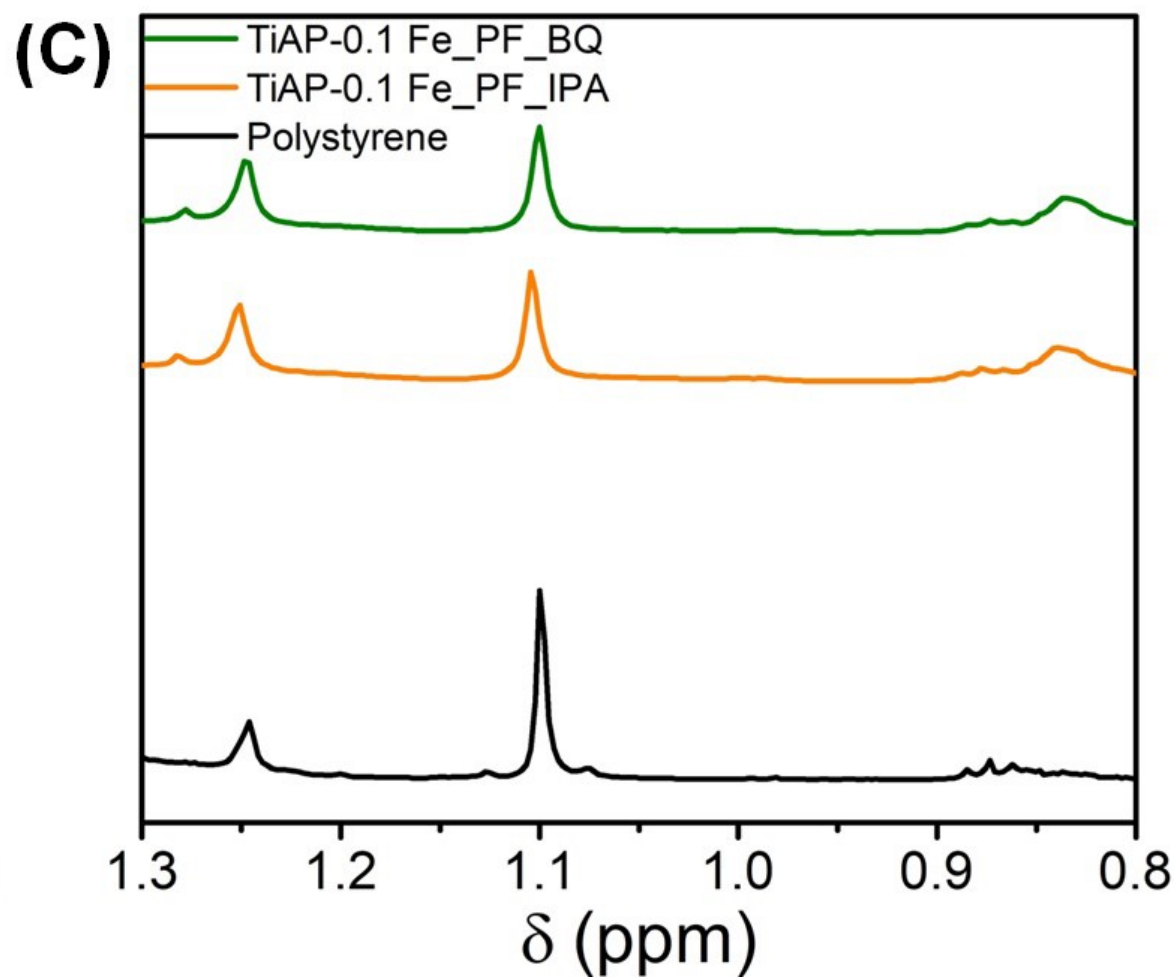

Supplement: d4en00818a11.pdf [file d4en00818a11.pdf]

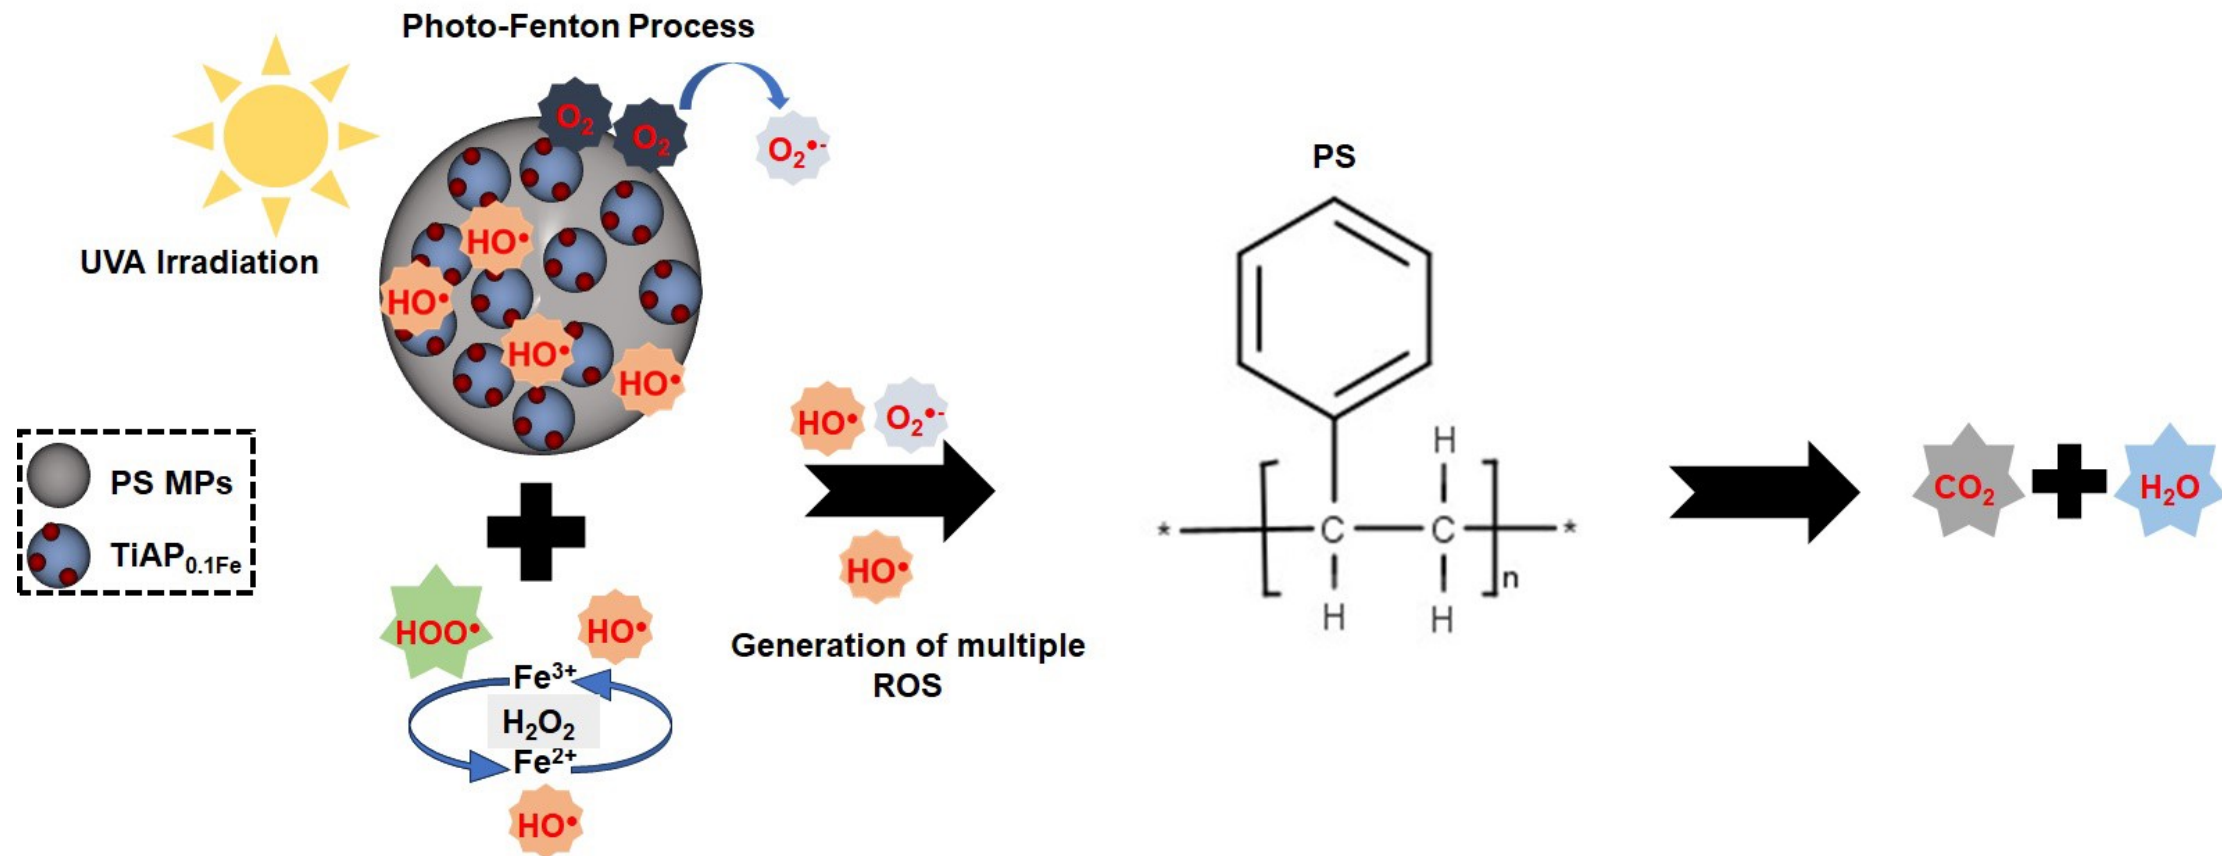

Supplement: d4en00818a12.pdf [file d4en00818a12.pdf]

(A)

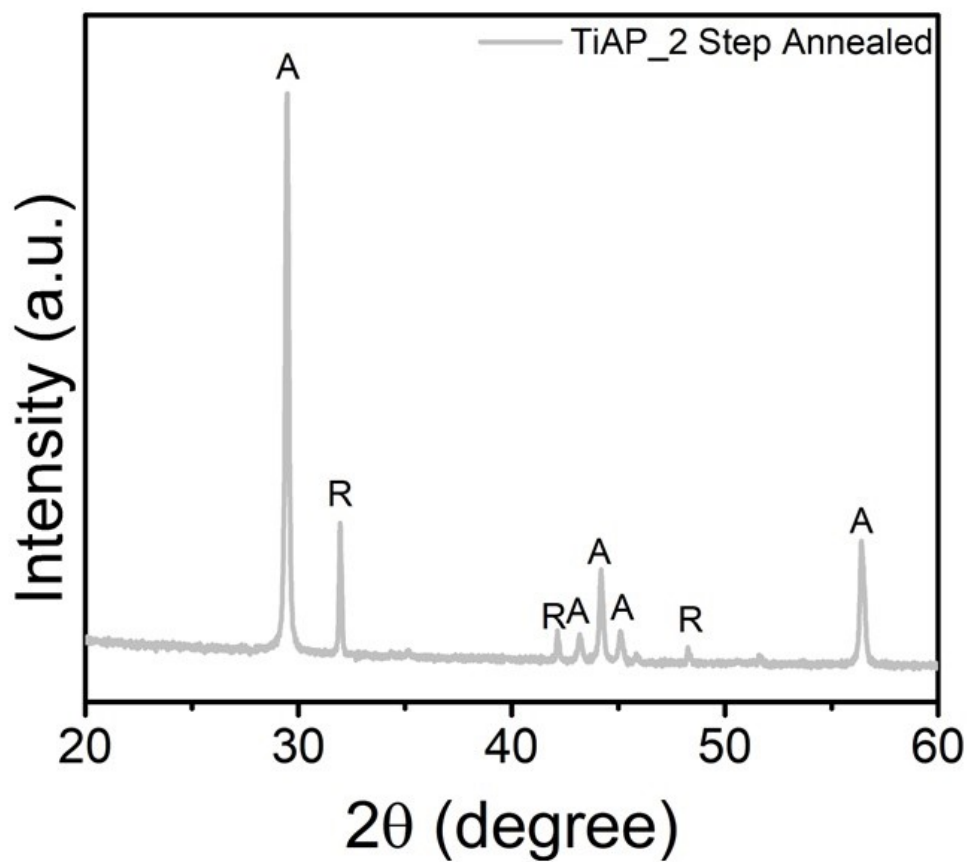

(B)

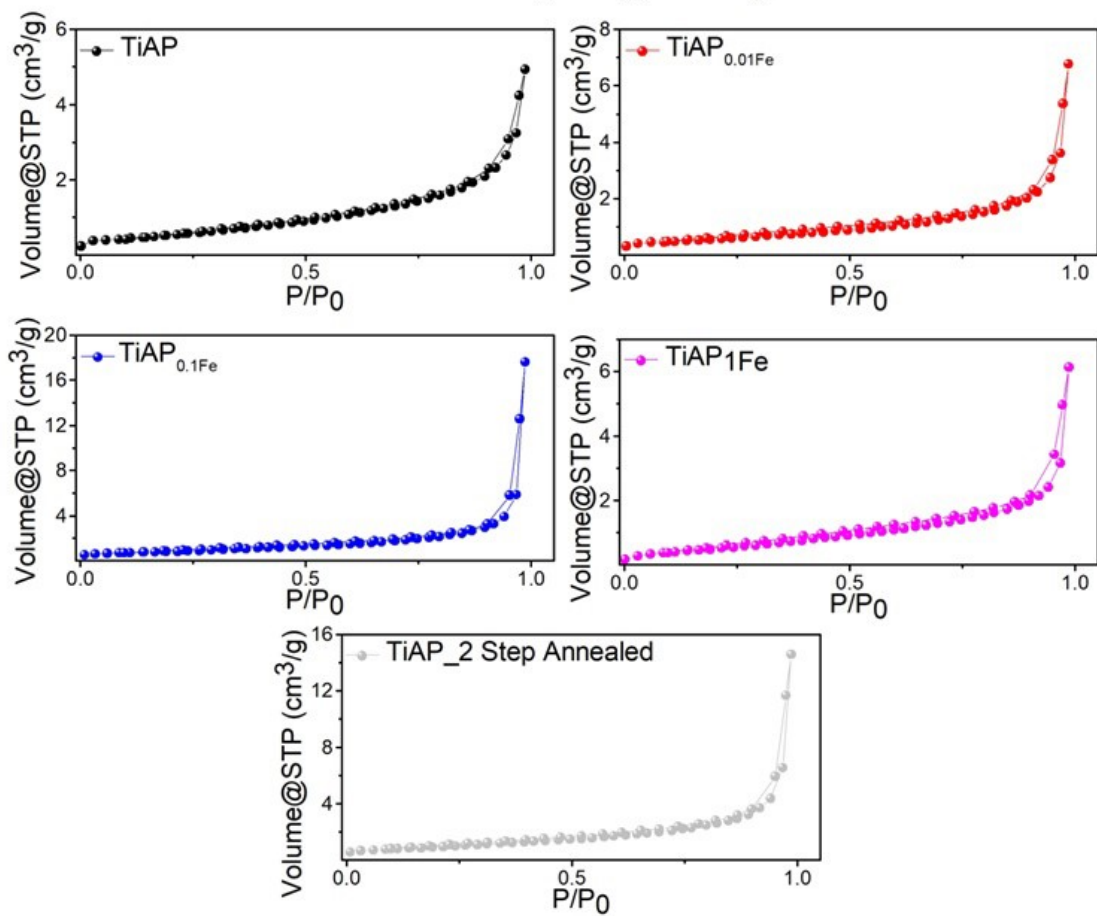

Supplement: d4en00818a13.pdf [file d4en00818a13.pdf]

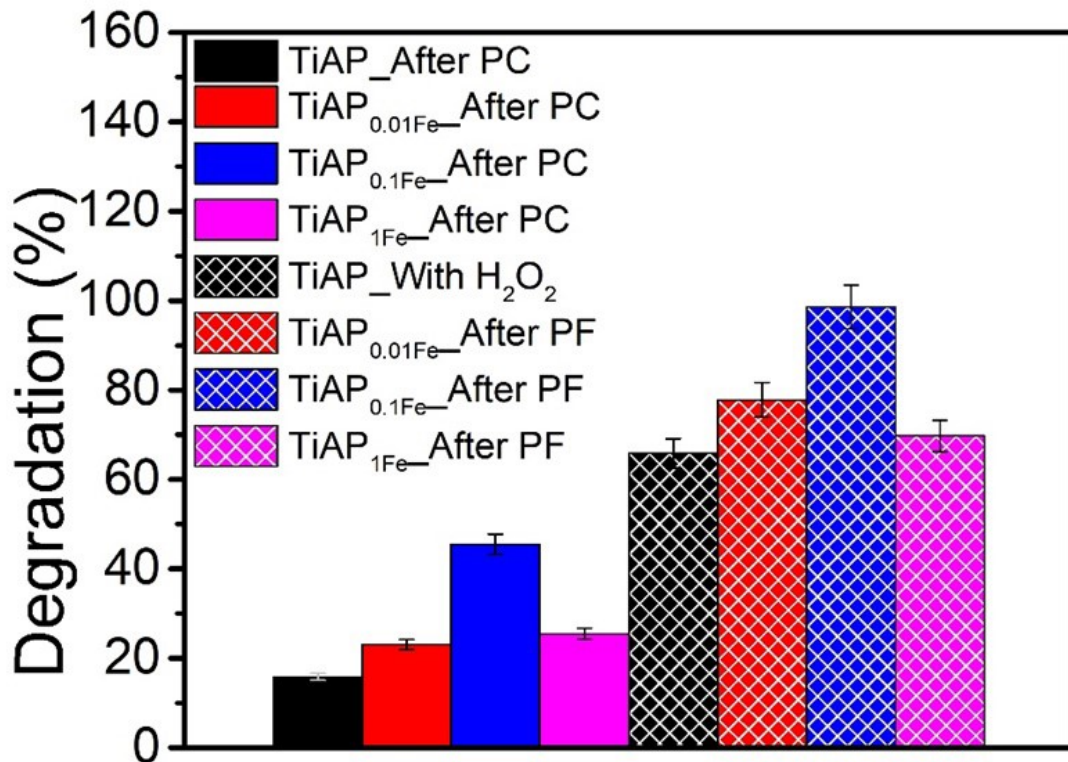

Supplement: d4en00818a14.pdf [file d4en00818a14.pdf]

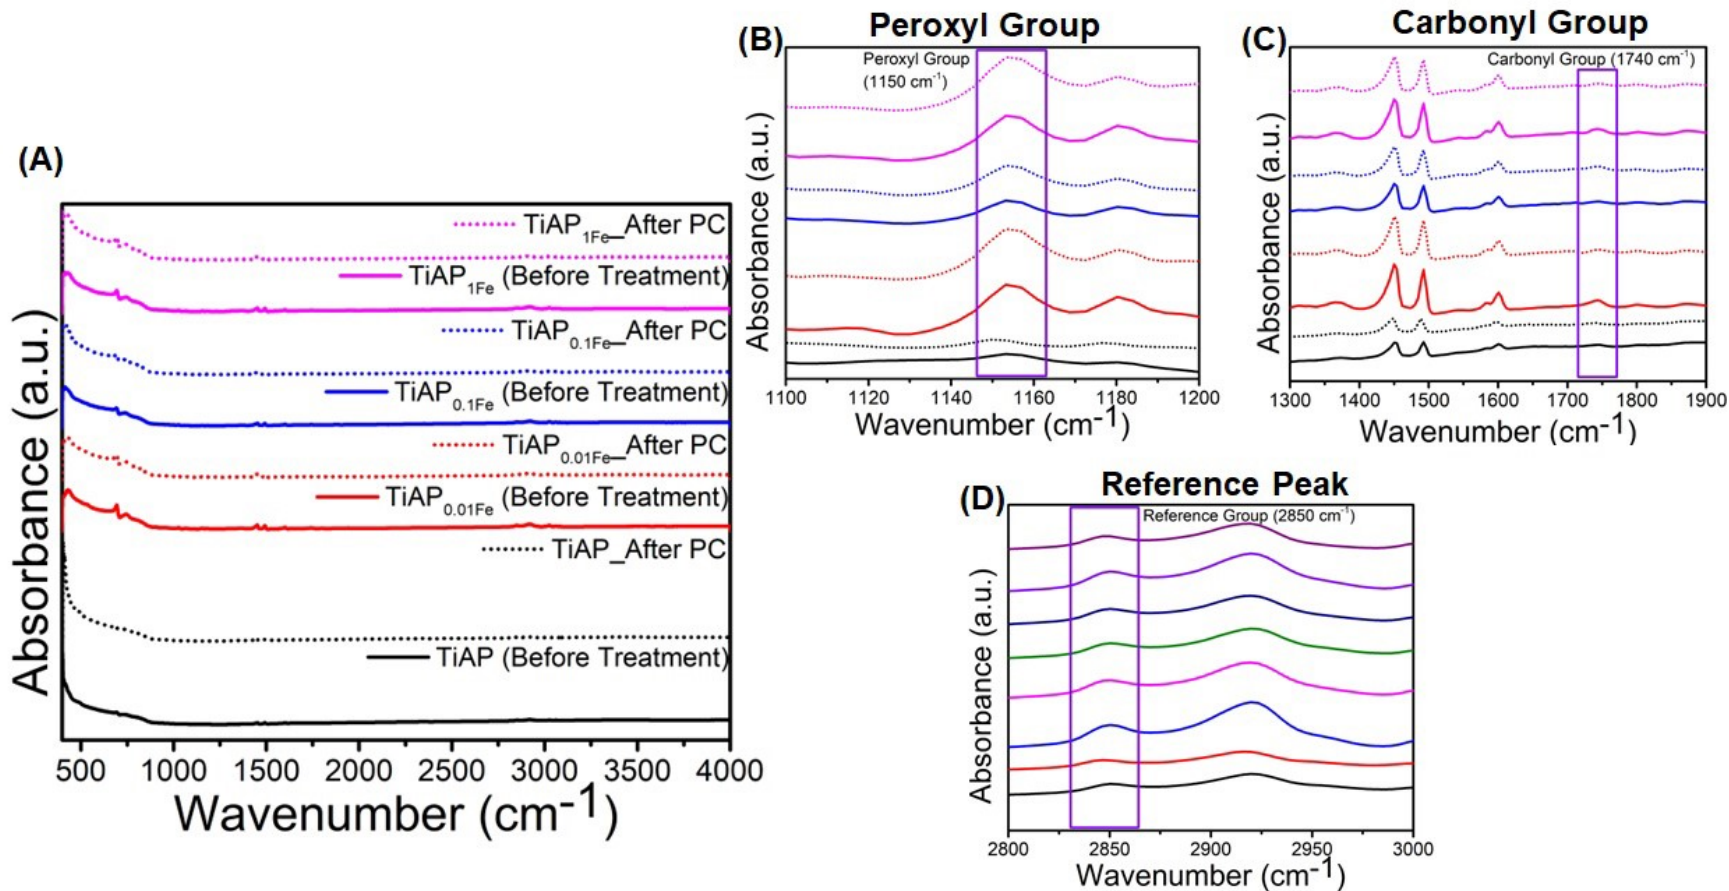

Supplement: d4en00818a15.pdf [file d4en00818a15.pdf]

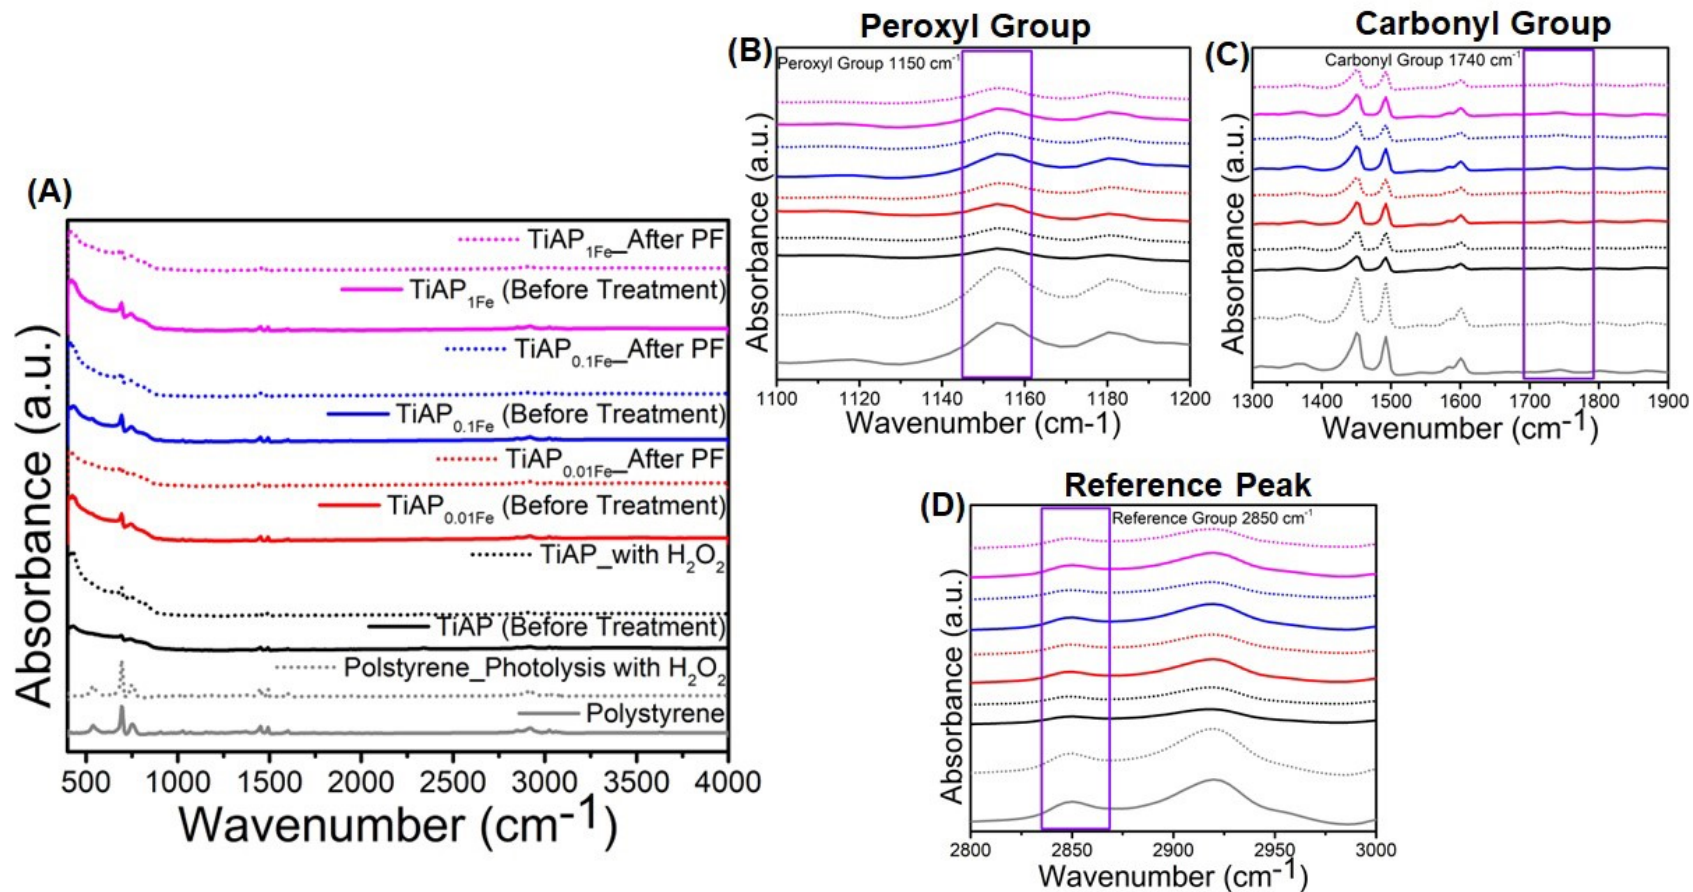

Supplement: d4en00818a16.pdf [file d4en00818a16.pdf]

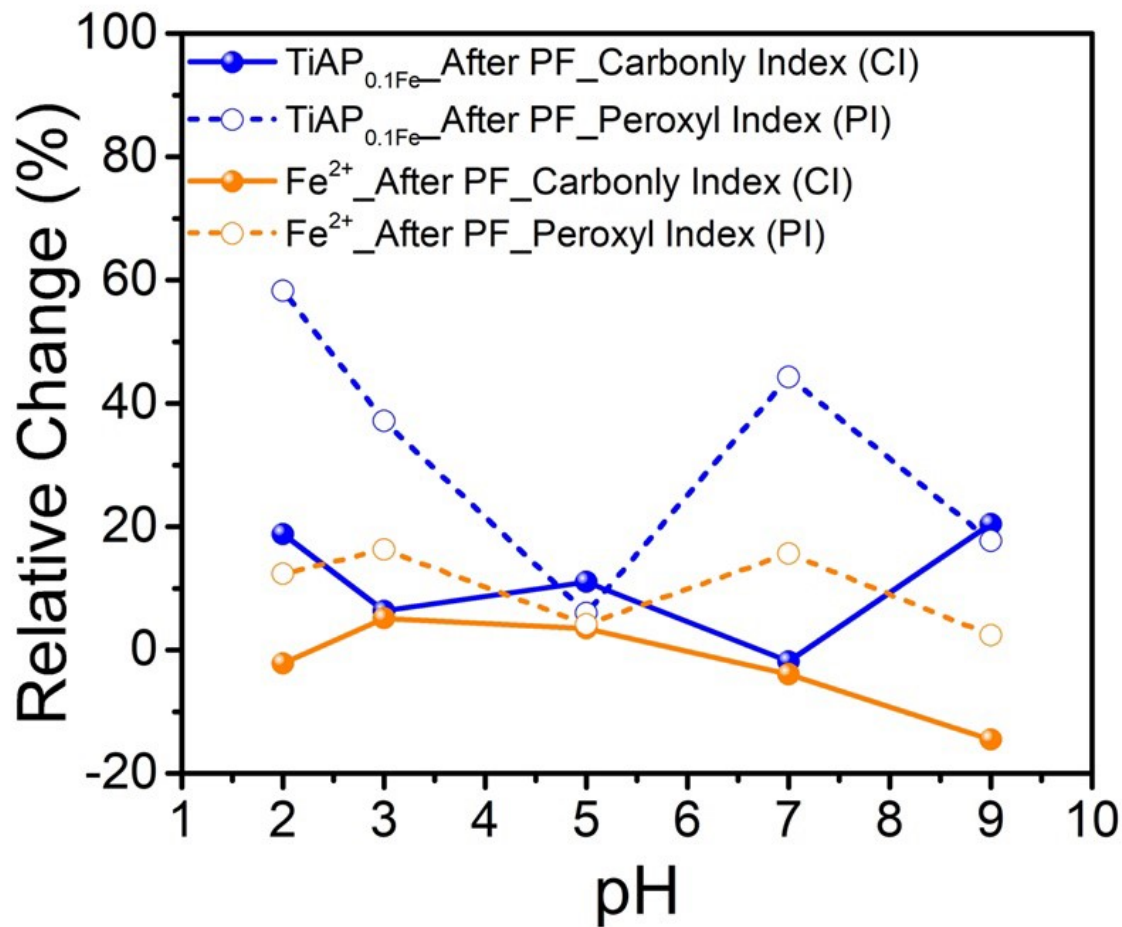

Supplement: d4en00818a17.pdf [file d4en00818a17.pdf]

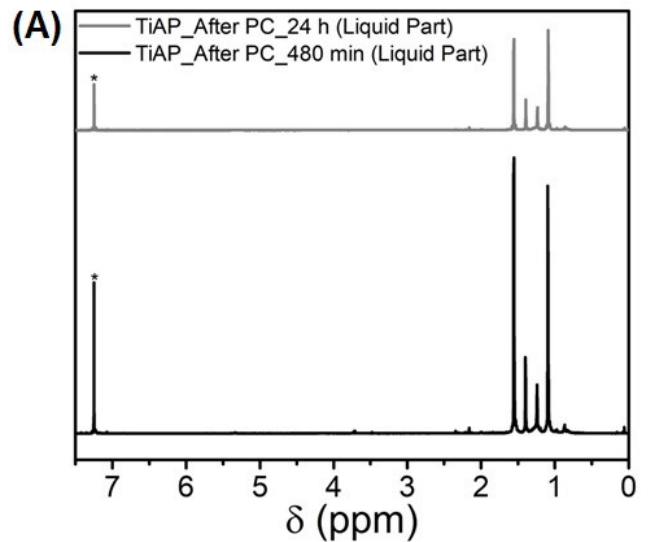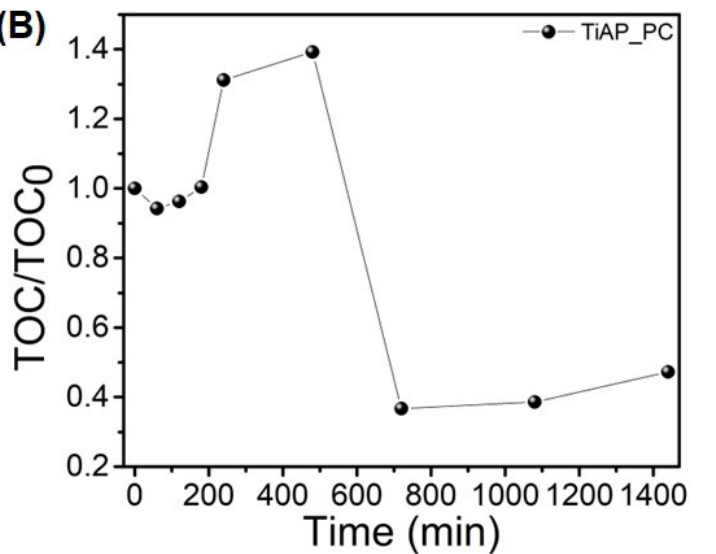

Supplement: d4en00818a18.pdf [file d4en00818a18.pdf]

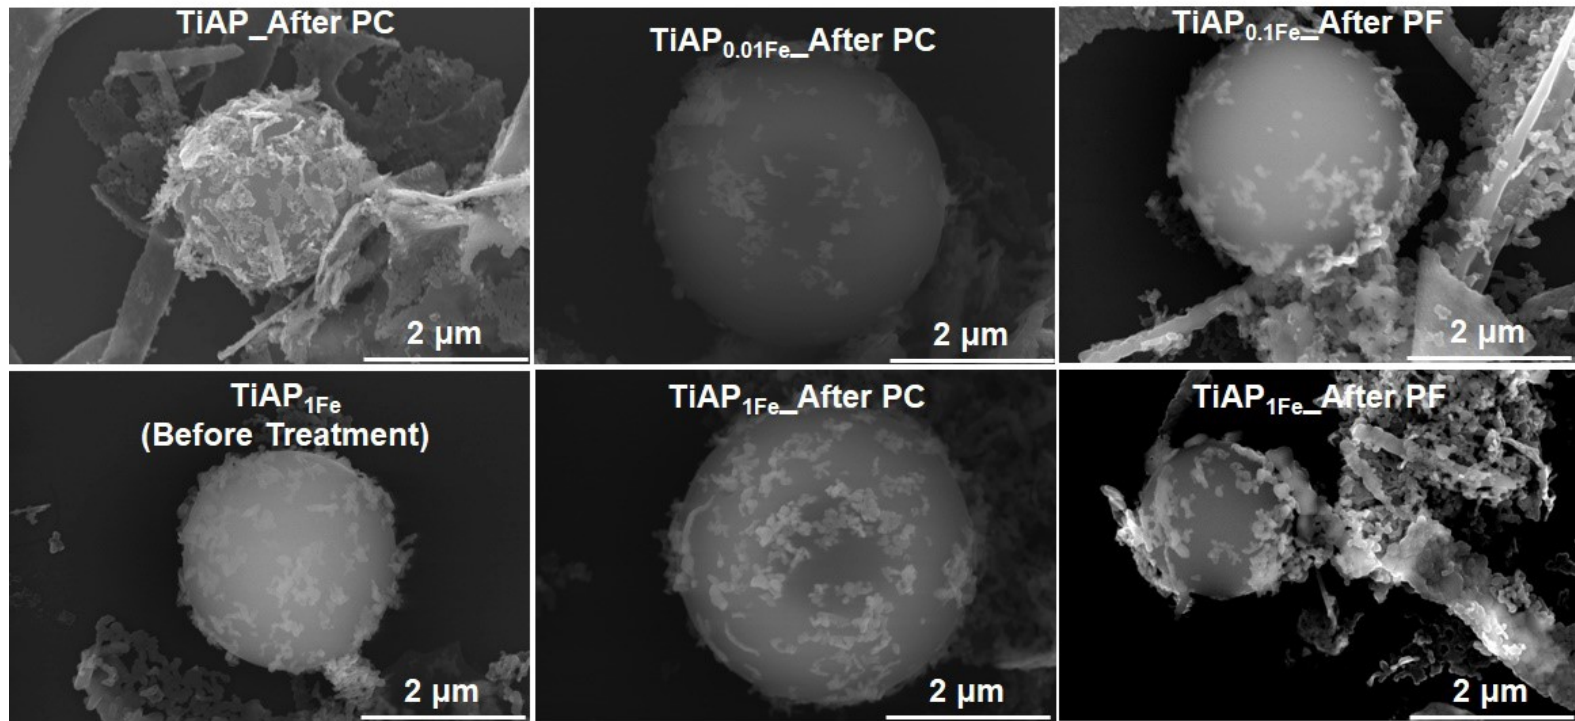

Supplement: d4en00818a19.pdf [file d4en00818a19.pdf]

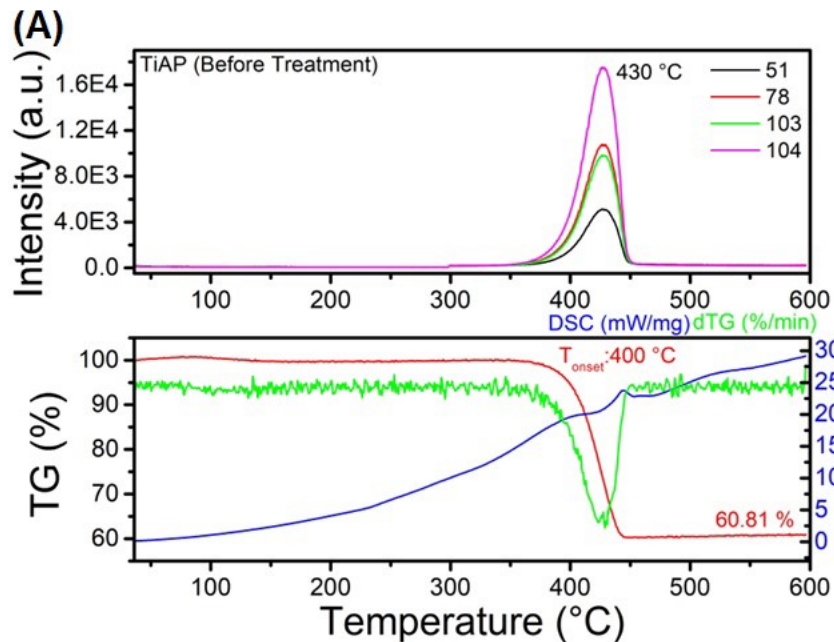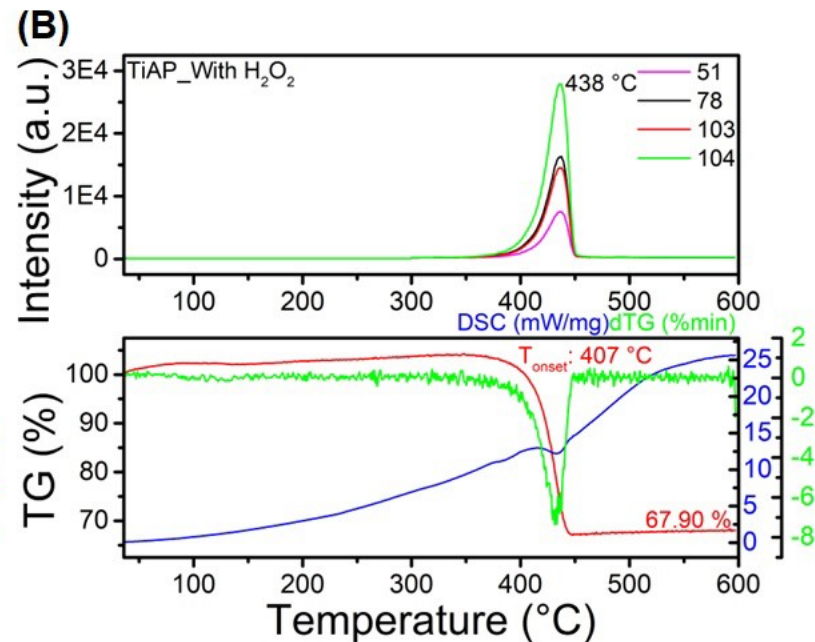

Supplement: d4en00818a20.pdf [file d4en00818a20.pdf]

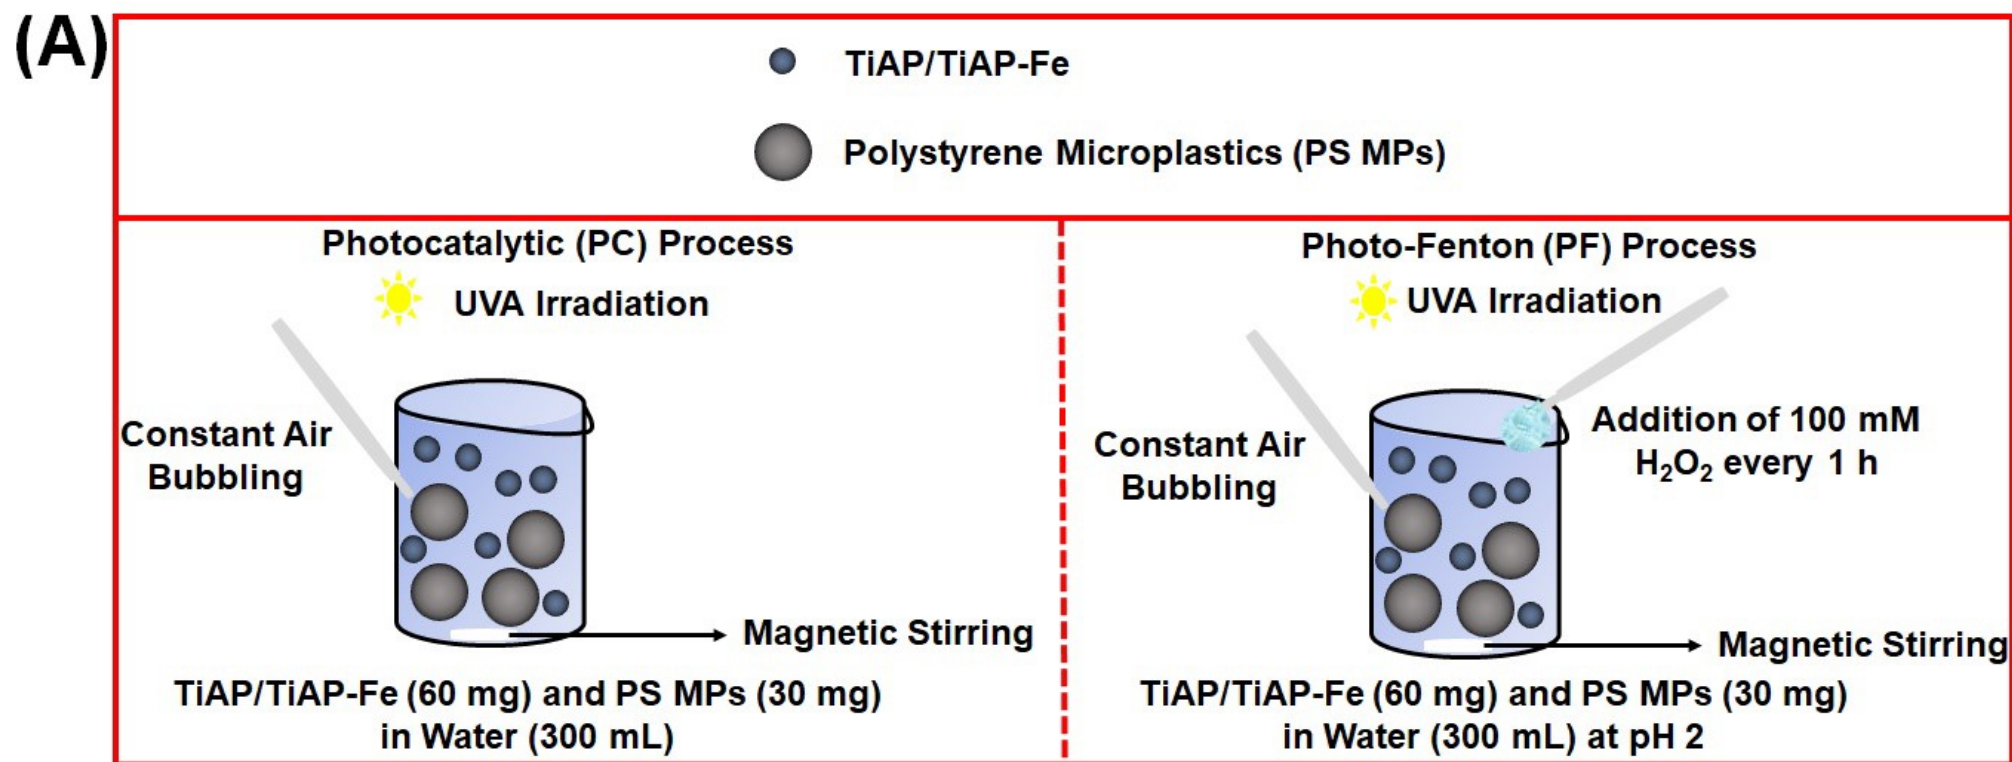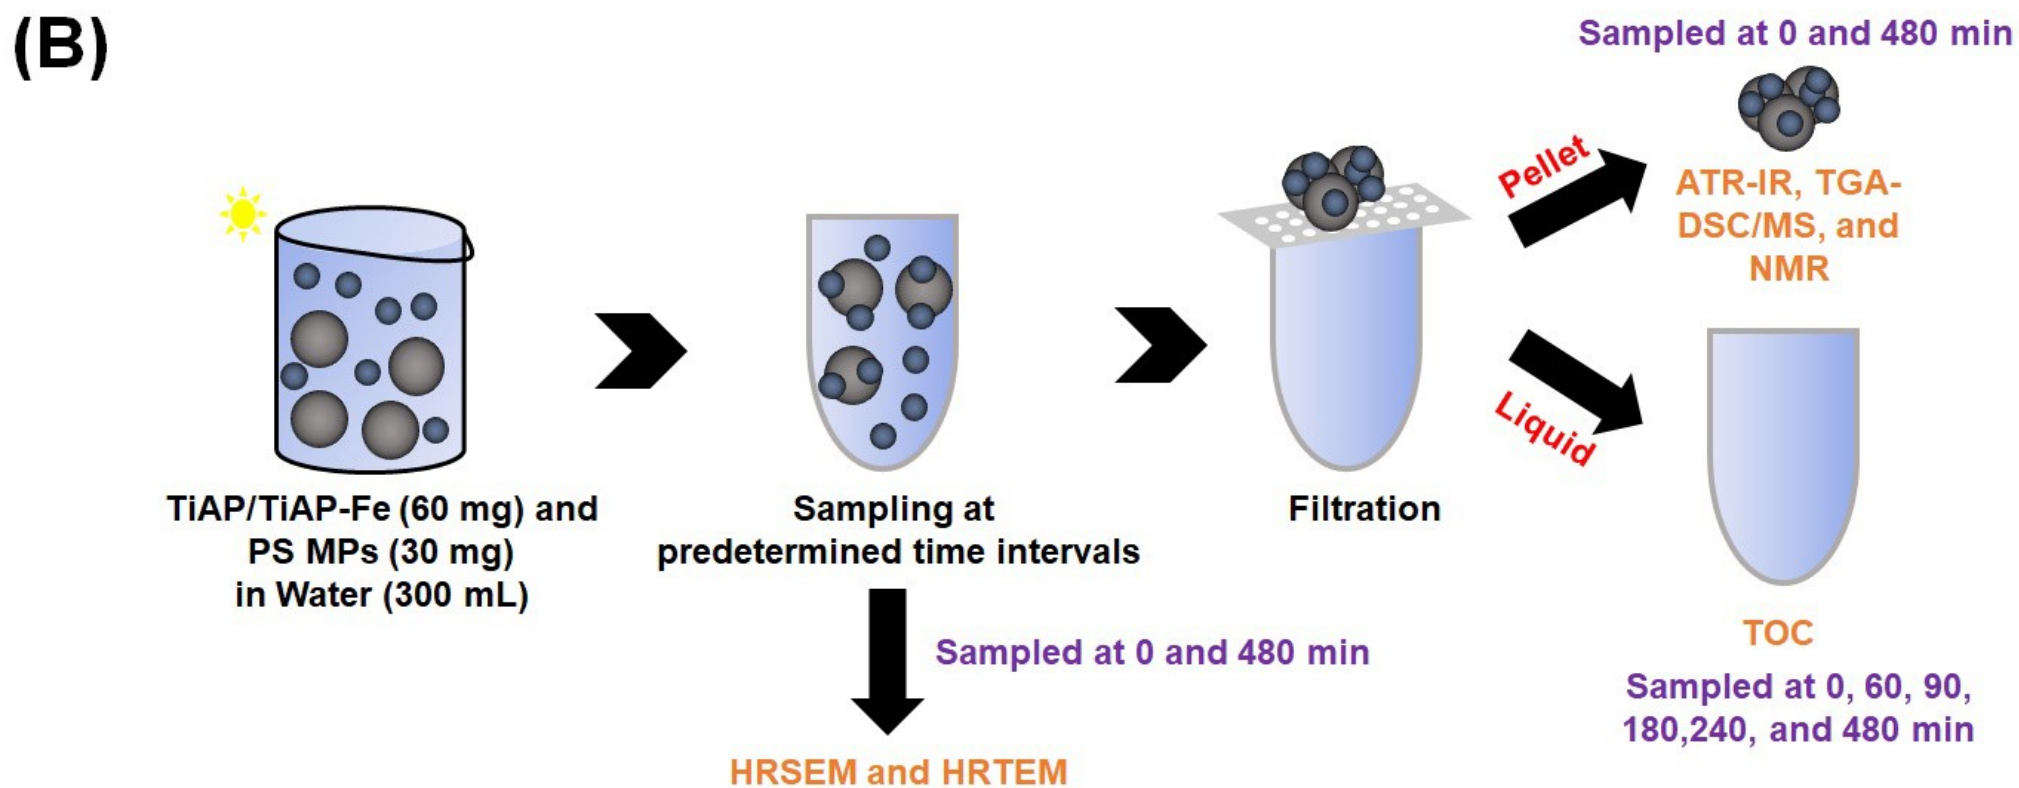

Supplement: d4en00818a3.pdf [file d4en00818a3.pdf]

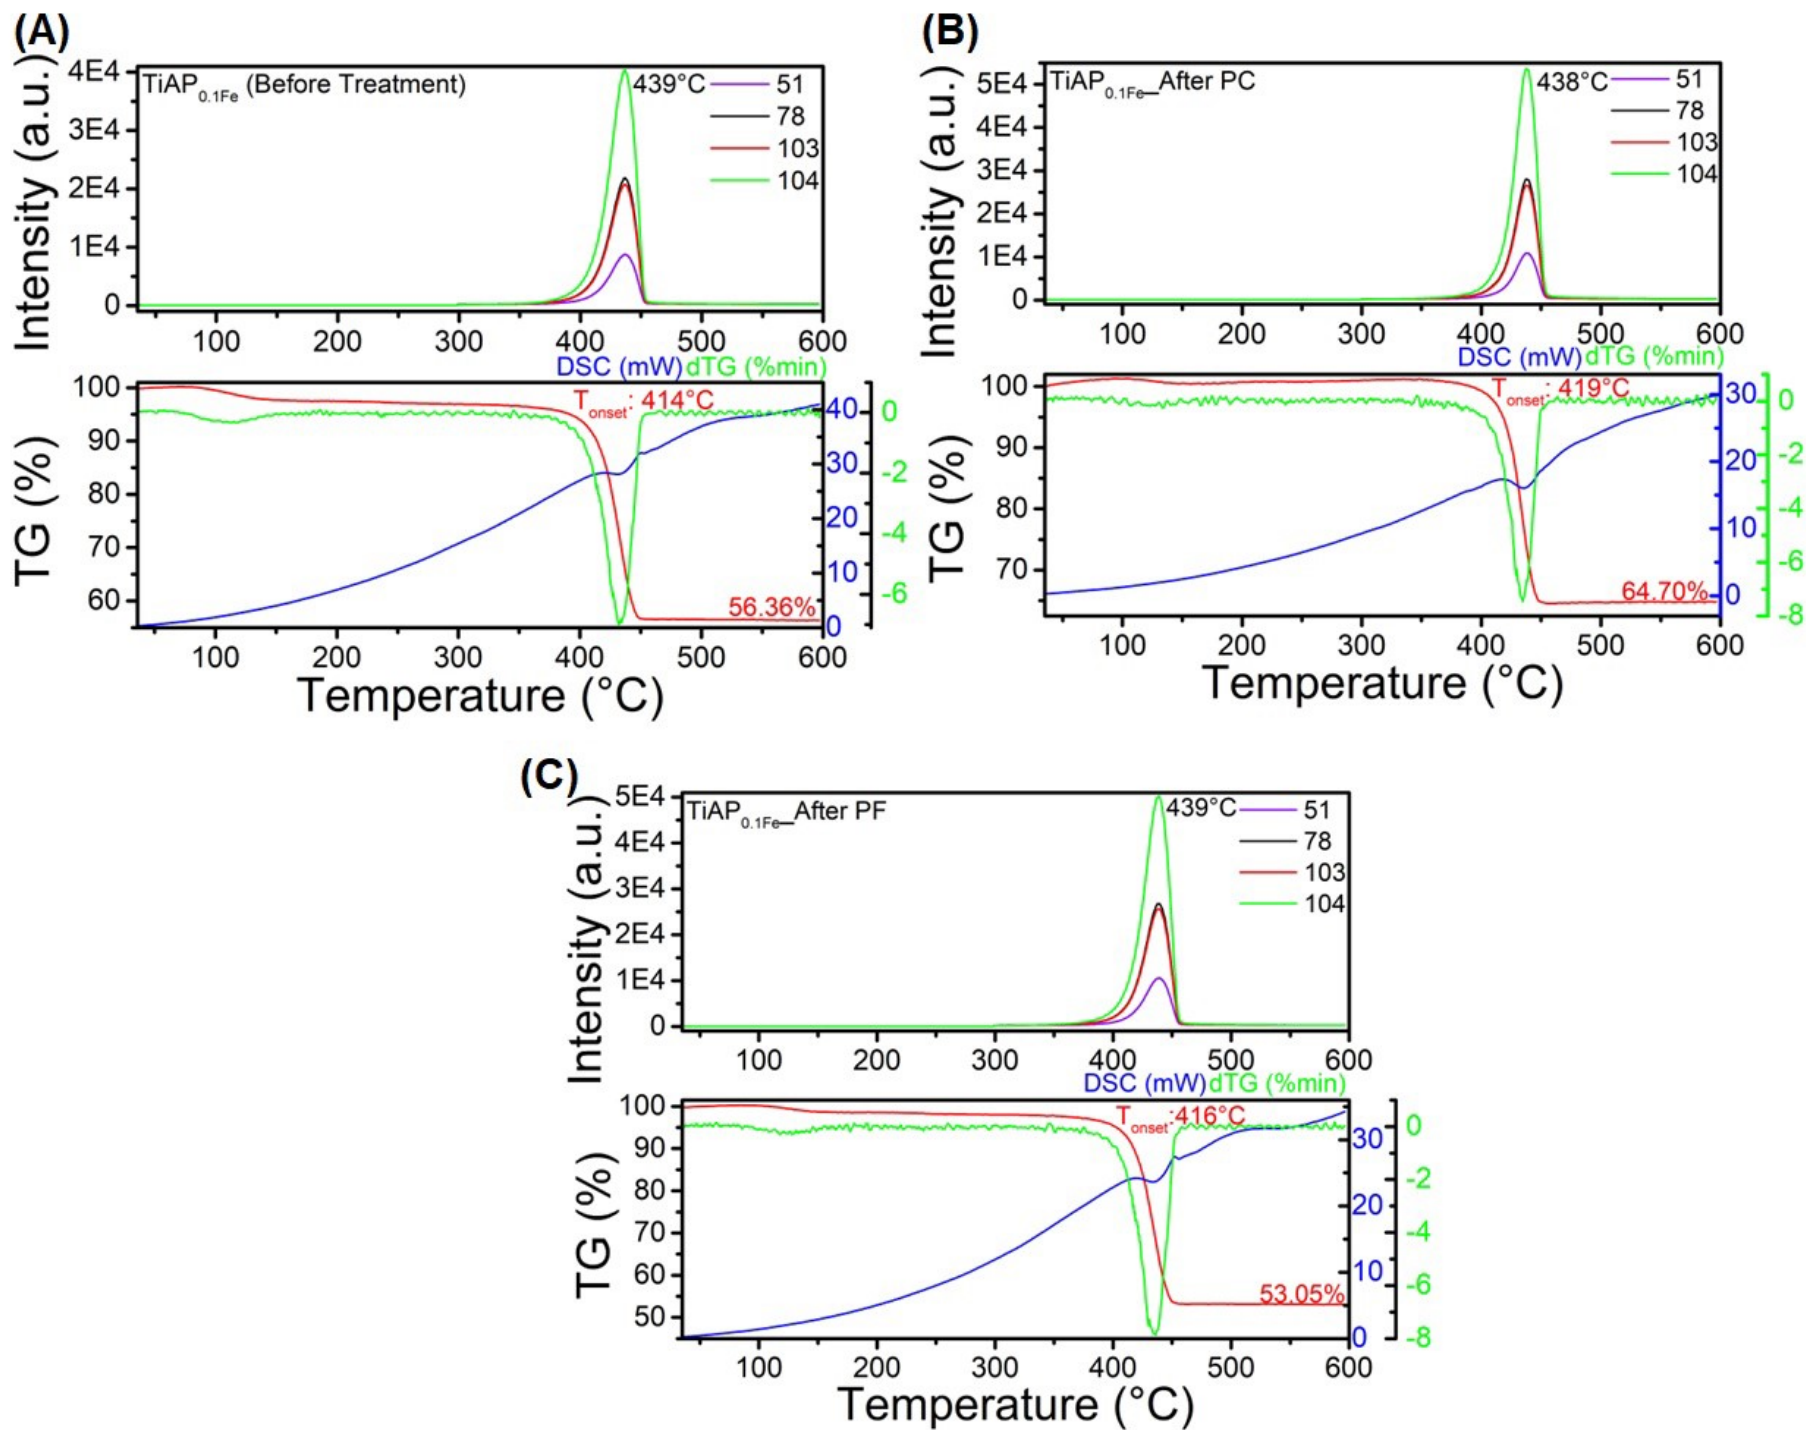

Supplement: d4en00818a4.pdf [file d4en00818a4.pdf]

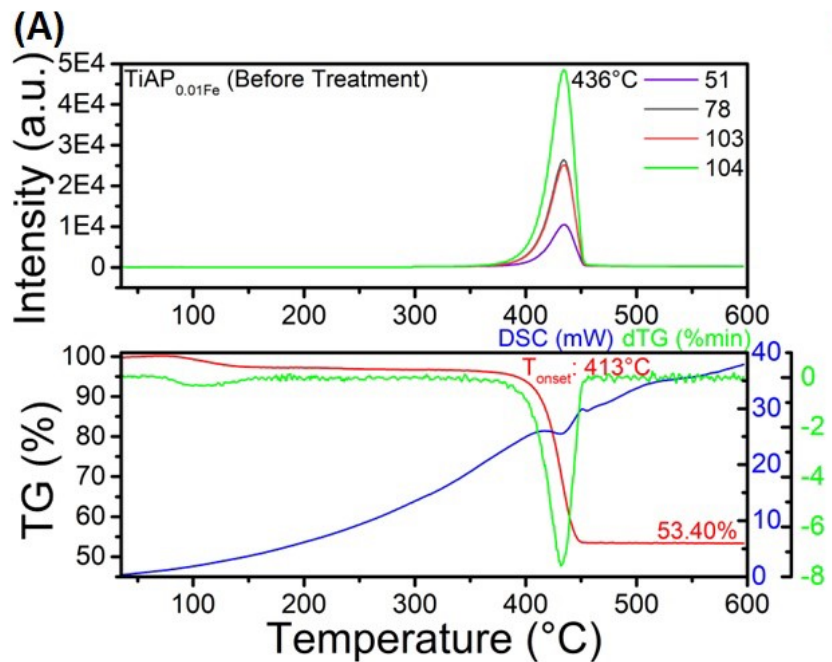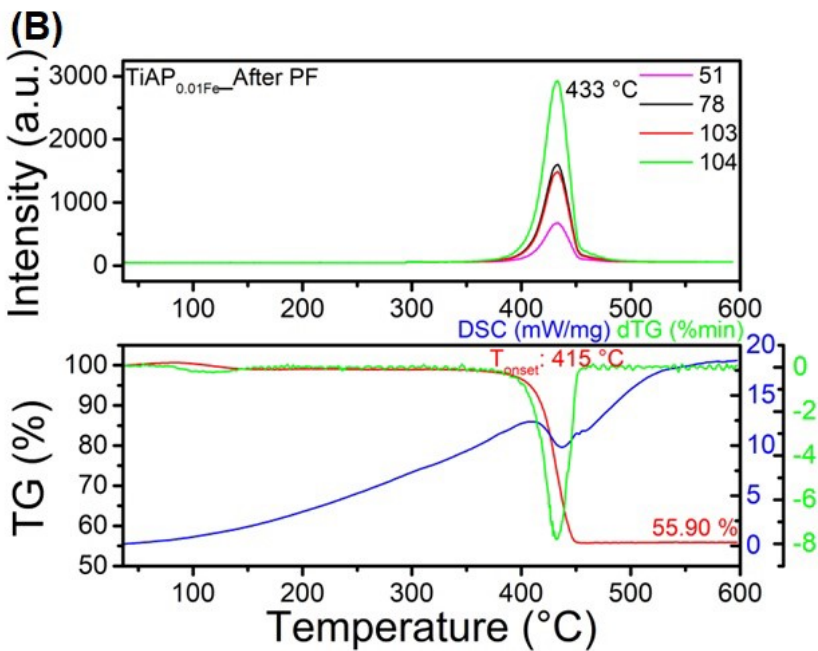

Supplement: d4en00818a5.pdf [file d4en00818a5.pdf]

(A)

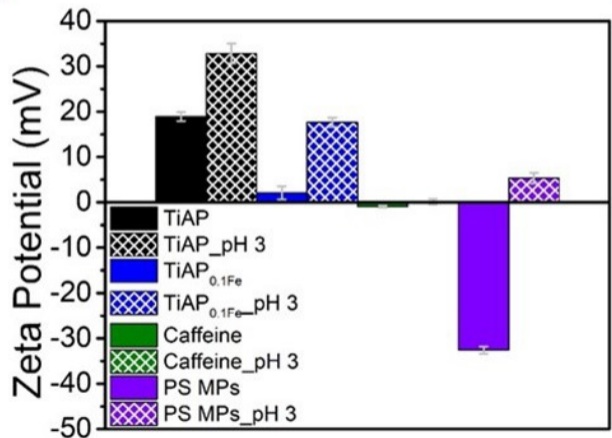

(B)

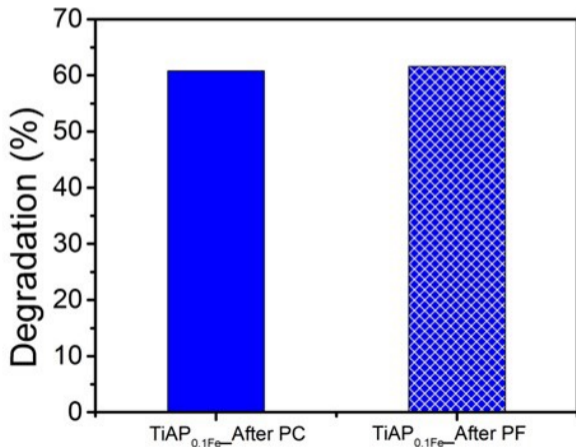

Supplement: d4en00818a6.pdf [file d4en00818a6.pdf]

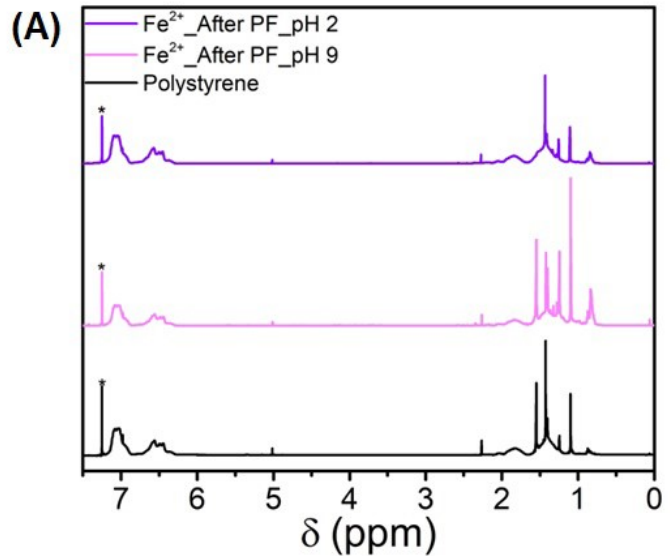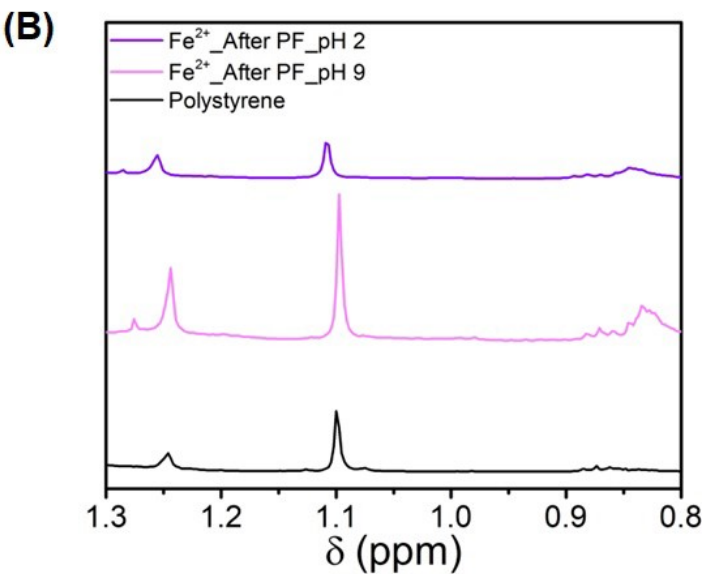

Supplement: d4en00818a7.pdf [file d4en00818a7.pdf]

(A)

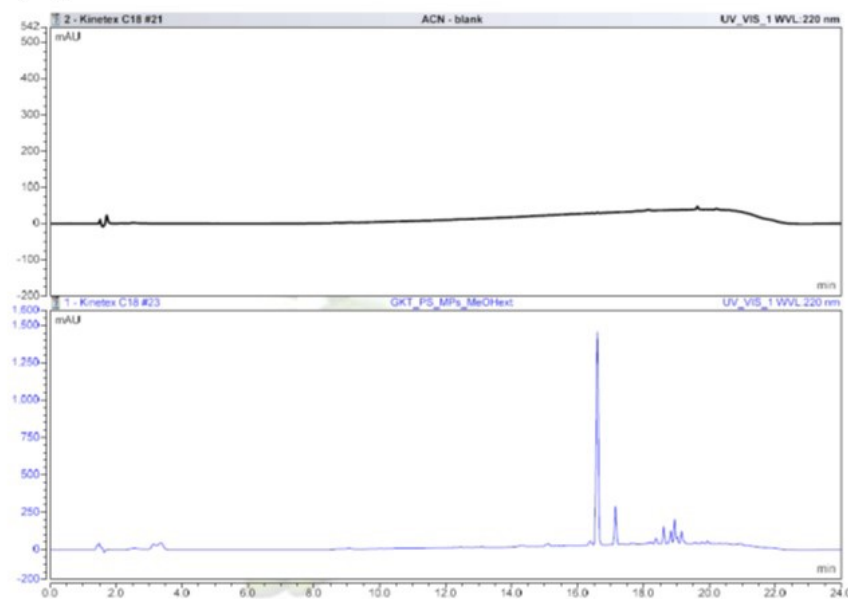

(B)

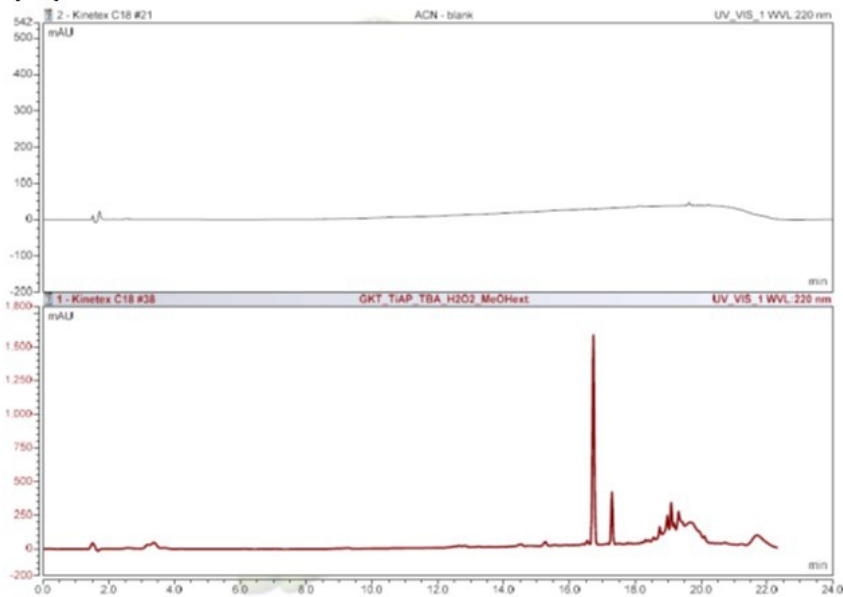

Supplement: d4en00818a8.pdf [file d4en00818a8.pdf]

(A)

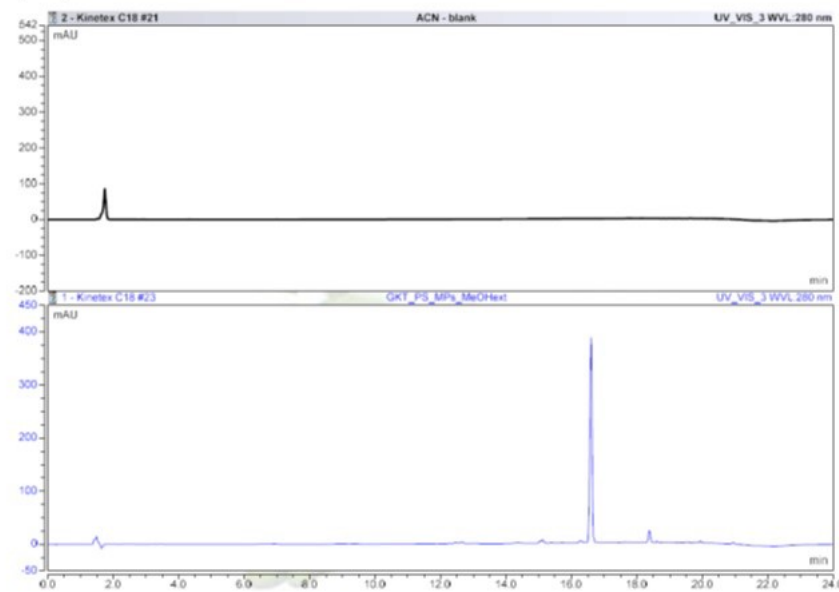

(B)

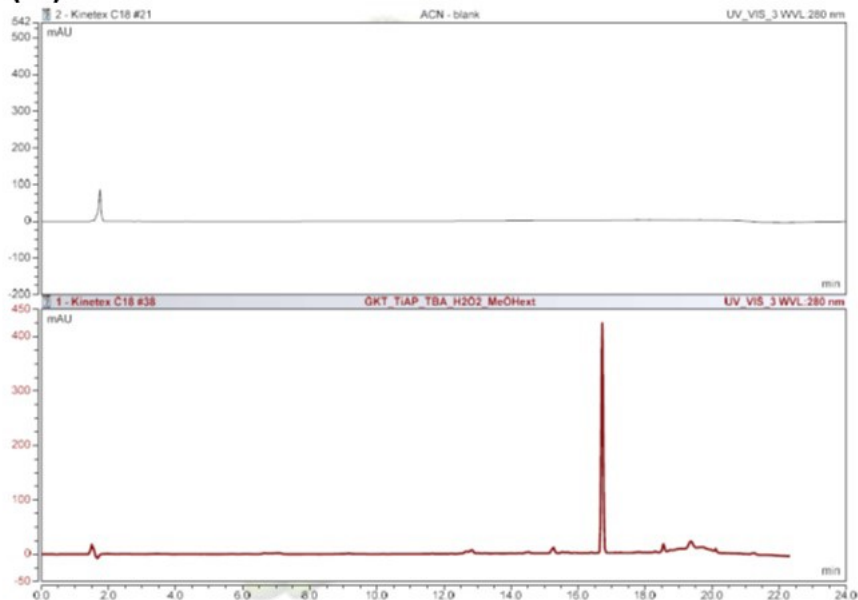

Supplement: d4en00818a9.pdf [file d4en00818a9.pdf]
